# Supplementary material
Source: publisher figshare collection journal article supplement (https://frontiersin.figshare.com/ndownloader/files/13235765)
Supplement: Supplementary file [file 13235765]

Table S2. Oxygen concentration in "All-N" experiments. Exp - experiment ID; FSW - filtered seawater; Cop - copepods; T - tracers; B - bacterial inoculant (unfiltered seawater added); NU - nutrients; T0 - time zero; incubated - measured at the end of the incubation.

| Exp | Treatment                                    | Abbreviation | O <sub>2</sub> (μmol L <sup>-1</sup> ) |
|-----|----------------------------------------------|--------------|----------------------------------------|
| 5   | T0 FSW+tracers; killed at T0                 | FSW+T T0     | 167.66                                 |
| 5   | T0 FSW+tracers; killed at T0                 | FSW+T T0     | 167.64                                 |
| 5   | T0 FSW+Copepods+tracers; killed at T0        | FSW+Cop+T T0 | 168.23                                 |
| 5   | T0 FSW+Copepods+tracers; killed at T0        | FSW+Cop+T T0 | 157.73                                 |
| 5   | FSW+Copepods+tracers; incubated              | FSW+Cop+T    | 36.09                                  |
| 5   | FSW+Copepods+tracers; incubated              | FSW+Cop+T    | 22.17                                  |
| 5   | FSW+seawater inoculum+tracers; incubated     | FSW+B+T      | 158.41                                 |
| 5   | FSW+seawater inoculum+tracers; incubated     | FSW+B+T      | 158.69                                 |
| 5   | FSW+SW inoculum+nutrients+tracers; incubated | FSW+B+NU+T   | 160.88                                 |
| 5   | FSW+SW inoculum+nutrients+tracers; incubated | FSW+B+NU+T   | 157.10                                 |
| 6   | FSW+tracers; killed at T0                    | FSW+T T0     | 178.96                                 |
| 6   | FSW+tracers; killed at T0                    | FSW+T T0     | 176.90                                 |
| 6   | Copepods+tracers; killed at T0               | FSW+Cop+T T0 | 170.25                                 |
| 6   | Copepods+tracers; killed at T0               | FSW+Cop+T T0 | 160.74                                 |
| 6   | FSW+seawater inoculum+tracers; incubated     | FSW+B+T      | 173.69                                 |
| 6   | FSW+seawater inoculum+tracers; incubated     | FSW+B+T      | 186.60                                 |
| 6   | FSW+Copepods; incubated                      | FSW+Cop      | 17.22                                  |
| 6   | FSW+Copepods; incubated                      | FSW+Cop      | 70.16                                  |
| 6   | FSW+Copepods+tracers; incubated              | FSW+Cop+T    | 14.10                                  |
| 6   | FSW+Copepods+tracers; incubated              | FSW+Cop+T    | 13.99                                  |
| 6   | FSW+Copepods+tracers; incubated              | FSW+Cop+T    | 45.31                                  |
| 6   | FSW+SW inoculum+tracers; incubated           | FSW+B+T      | 180.53                                 |
| 6   | FSW+SW inoculum+tracers; incubated           | FSW+B+T      | 173.05                                 |
| 6   | FSW+SW inoculum+tracers; incubated           | FSW+B+T      | 171.74                                 |
| 6   | FSW+SW inoculum+nutrients+tracers; incubated | FSW+B+NU+T   | 170.82                                 |
| 6   | FSW+SW inoculum+nutrients+tracers; incubated | FSW+B+NU+T   | 173.08                                 |
| 6   | FSW+SW inoculum+nutrients+tracers; incubated | FSW+B+NU+T   | 173.67                                 |
| 7   | FSW+tracer; killed at T0                     | FSW+T T0     | 168.36                                 |
| 7   | FSW+tracer; killed at T0                     | FSW+T T0     | 176.38                                 |
| 7   | FSW+Copepods+tracers; killed at T0           | FSW+Cop+T T0 | 168.26                                 |
| 7   | FSW+Copepods+tracers; killed at T0           | FSW+Cop+T T0 | 169.25                                 |
| 7   | FSW+Copepods; killed at T0                   | FSW+Cop T0   | 175.76                                 |
| 7   | FSW+Copepods; killed at T0                   | FSW+Cop T0   | 176.33                                 |
| 7   | FSW+seawater inoculum; incubated             | FSW+B        | 132.43                                 |
| 7   | FSW+seawater inoculum; incubated             | FSW+B        | 121.71                                 |
| 7   | FSW+copepods; incubated                      | FSW+Cop      | 113.54                                 |
| 7   | FSW+copepods; incubated                      | FSW+Cop      | 141.29                                 |
